# Supplementary material for: Juvenile hormone, but not nutrition or social cues, affects reproductive maturation in solitary alkali bees ( Nomia melanderi )
Source: Oxford University Press journal article supplement (doi:10.1242/jeb.162255), 2017-01-01
Supplement: jeb162255supp.pdf [file jeb162255supp.pdf]

## Supplementary material

**Table S1** Results of a linear model explaining maximum terminal oocyte length among alkali bees. Lab-reared females in the sugar water only treatment are the base from which all comparisons are made. s.e. = standard error; overall model results:  $F_{4,89} = 82.42$ ,  $r^2 = 0.58$ ,  $p < 4.79 \times 10^{-16}$ .

|                                | Coefficient | s.e. | t     | p                      |
|--------------------------------|-------------|------|-------|------------------------|
| Intercept                      | 1.09        | 0.02 | 63.07 | $2.00 \times 10^{-16}$ |
| Sugar water + pollen           | -0.00       | 0.02 | -0.22 | 0.82                   |
| Sugar water + pollen + flowers | -0.02       | 0.02 | -0.97 | 0.33                   |
| Newly emerged                  | -0.13       | 0.02 | -6.38 | $7.92 \times 10^{-9}$  |
| Nesting, reproductive          | 0.76        | 0.10 | 7.51  | $0.95 \times 10^{-3}$  |

**Table S2** Results of a linear model explaining Dufour's gland length among alkali bees. Lab-reared females in the sugar water only treatment are the base from which all comparisons are made. s.e. = standard error; overall model results:  $F_{4,101} = 45.80$ ,  $r^2 = 0.64$ ,  $p < 2.20 \times 10^{-16}$ .

|                                | Coefficient | s.e. | t     | p                      |
|--------------------------------|-------------|------|-------|------------------------|
| Intercept                      | 3.96        | 0.10 | 39.99 | $2.00 \times 10^{-16}$ |
| Sugar water + pollen           | 0.09        | 0.13 | 0.69  | 0.49                   |
| Sugar water + pollen + flowers | -0.10       | 0.14 | -0.74 | 0.46                   |
| Newly emerged                  | -0.60       | 0.11 | -5.12 | $1.47 \times 10^{-6}$  |
| Nesting, reproductive          | 0.78        | 0.13 | 6.06  | $2.33 \times 10^{-8}$  |

**Table S3** Results of a linear model explaining maximum terminal oocyte length among alkali bees. Females in the sham control/solitary group are the base from which all comparisons are made. s.e. = standard error; overall model results:  $F_{5,41} = 6.68$ ,  $r^2 = 0.45$ ,  $p = 1.23 \times 10^{-4}$ .

|                                                  | Coefficient | s.e. | t     | p                      |
|--------------------------------------------------|-------------|------|-------|------------------------|
| Intercept                                        | 1.21        | 0.13 | 9.22  | $1.49 \times 10^{-11}$ |
| Environment: Social                              | 0.16        | 0.19 | 1.42  | 0.16                   |
| Endocrine: Solvent control                       | 0.05        | 0.18 | 1.99  | 0.05                   |
| Endocrine: 50 $\mu$ g JH                         | 1.22        | 0.25 | 4.94  | $1.37 \times 10^{-5}$  |
| Environment: Social x Endocrine: Solvent control | -0.11       | 0.26 | -0.41 | 0.68                   |
| Environment: Social x Endocrine: 50 $\mu$ g JH   | -0.45       | 0.37 | -1.21 | 0.23                   |

**Table S4** Results of a linear model explaining Dufour's gland length among alkali bees. Females in the sham control/solitary group are the base from which all comparisons are made. s.e. = standard error; overall model results:  $F_{6,57} = 8.77$ ,  $r^2 = 0.48$ ,  $p = 8.97 \times 10^{-7}$ .

|                                                  | Coefficient | s.e. | t     | p                     |
|--------------------------------------------------|-------------|------|-------|-----------------------|
| Intercept                                        | 1.58        | 1.25 | 1.28  | 0.21                  |
| Intertegular width                               | 1.16        | 0.50 | 2.31  | 0.02                  |
| Environment: Social                              | 0.12        | 0.23 | 0.53  | 0.60                  |
| Endocrine: Solvent control                       | 0.55        | 0.23 | 2.42  | 0.02                  |
| Endocrine: 50 $\mu$ g JH                         | 1.22        | 0.24 | 5.02  | $5.45 \times 10^{-6}$ |
| Environment: Social x Endocrine: Solvent control | -0.40       | 0.33 | -1.19 | 0.24                  |
| Environment: Social x Endocrine: 50 $\mu$ g JH   | -0.19       | 0.36 | -0.52 | 0.60                  |

**Table S5** Results of a linear model explaining maximum terminal oocyte length among alkali bees with a reduced dataset. Females in the sham control/solitary group are the base from which all comparisons are made. Social partners in which the reproductive female was smaller and/or had less developed reproductive anatomy than the newly emerged cage-mate were eliminated. s.e. = standard error; overall model results:  $F_{5,33} = 5.98$ ,  $r^2 = 0.48$ ,  $p = 0.484 \times 10^{-4}$ .

|                                                  | Coefficient | s.e. | t     | p                      |
|--------------------------------------------------|-------------|------|-------|------------------------|
| Intercept                                        | 1.21        | 0.14 | 8.78  | $3.76 \times 10^{-10}$ |
| Environment: Social                              | 0.25        | 0.22 | 1.16  | 0.25                   |
| Endocrine: Solvent control                       | 0.36        | 0.19 | 1.89  | 0.07                   |
| Endocrine: 50 $\mu$ g JH                         | 1.22        | 0.26 | 4.70  | $4.43 \times 10^{-5}$  |
| Environment: Social x Endocrine: Solvent control | -0.08       | 0.33 | -0.23 | 0.82                   |
| Environment: Social x Endocrine: 50 $\mu$ g JH   | -0.43       | 0.40 | -1.09 | 0.28                   |

**Table S6** Results of a linear model explaining Dufour's gland length among alkali bees with a reduced dataset. Females in the sham control/solitary group are the base from which all comparisons are made. Social partners in which the reproductive female was smaller and/or had less developed reproductive anatomy than the newly emerged cage-mate were eliminated. s.e. = standard error; overall model results:  $F_{5,46} = 7.45$ ,  $r^2 = 0.45$ ,  $p = 3.45 \times 10^{-5}$ .

|                                                  | Coefficient | s.e. | t     | p                      |
|--------------------------------------------------|-------------|------|-------|------------------------|
| Intercept                                        | 4.46        | 0.17 | 25.93 | $2.00 \times 10^{-16}$ |
| Environment: Social                              | -0.07       | 0.26 | -0.26 | 0.79                   |
| Endocrine: Solvent control                       | 0.59        | 0.24 | 2.42  | 0.02                   |
| Endocrine: 50 $\mu$ g JH                         | 1.31        | 0.26 | 5.15  | $5.35 \times 10^{-6}$  |
| Environment: Social x Endocrine: Solvent control | -0.38       | 0.43 | -0.87 | 0.39                   |
| Environment: Social x Endocrine: 50 $\mu$ g JH   | -0.54       | 0.42 | -1.30 | 0.20                   |
